# Supplementary material for: Hierarchical Clustering Analysis for Predicting 1-Year Mortality After Starting Hemodialysis
Source: PubMed Central journal article supplement — Kidney Int Rep. 2020 May 23;5(8):1188–95. doi: 10.1016/j.ekir.2020.05.007 (PMC7403509; doi:10.1016/j.ekir.2020.05.007), 2020-05-23
Supplement: mmc1.pdf [file mmc1.pdf]

## Supplementary Methods

Clustering analysis is a method to perform grouping of similar objects into several clusters. Ideal clustering yields a set of clusters in which objects from different clusters are distinct from each other, while objects in the same cluster are similar. Generally, clustering analysis is aimed to find hidden pattern(s) in dataset.

**Agglomerative hierarchical clustering:** At the beginning of agglomerative hierarchical clustering, each object exists as a single cluster (**Panel 1a**). Based on a definition of distance between objects, the nearest clusters are sequentially merged until generating one big cluster (**Panel 1b, c, d**). This approach is also expressed as dendrogram in **Panel 2**. In our study, each patient contained 46 clinical parameters, which corresponded to 46-dimensional object. In creating a new set of clusters, sum of squared distances within suggested clusters were calculated, and new set of clusters were determined to minimize the sum value. This method is known as Ward's method. The distance between two objects was defined as Euclidean distance as follows:

$$\text{Euclidean distance between } \mathbf{a} \text{ and } \mathbf{b} = \sqrt{(b_1 - a_1)^2 + (b_2 - a_2)^2 + \dots + (b_n - a_n)^2} = \sqrt{\sum_{k=1}^n (b_k - a_k)^2}$$

\*  $\mathbf{a}$  and  $\mathbf{b}$  are  $n$ -dimensional objects;  $a_x, b_x$ :  $x$ th element of each object

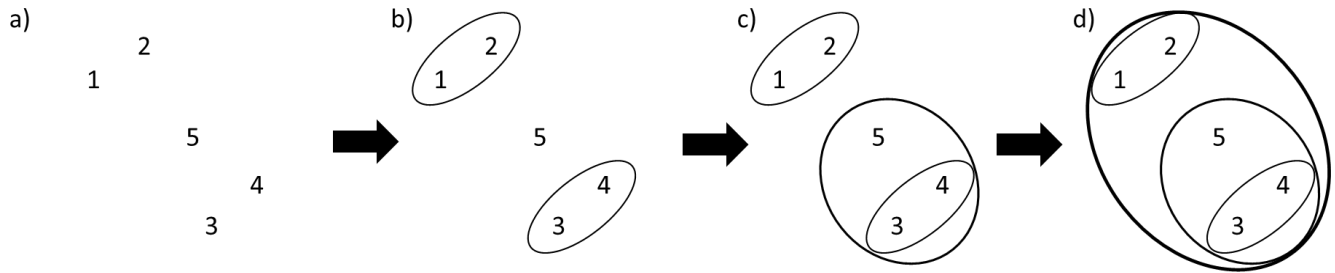

**Panel 1:** process of agglomerative hierarchical clustering

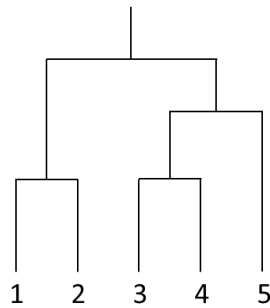

**Panel 2:** dendrogram generated as a result of agglomerative hierarchical clustering shown in panel 1

***K-means clustering:*** The K-means method is a non-hierarchical clustering algorithm. First, number of clusters (“k”) should be determined. K points are then randomly selected as center of each cluster (“centroid”). Other observations are assigned to their nearest centroids to form k clusters. When all objects have been assigned, the positions of the k centroids are moved to mean points of each cluster. Calculation and reclassification are repeated until the centroids no longer move.

**Reference:**

1. Moore WC, Meyers DA, Wenzel SE, *et al.* Identification of asthma phenotypes using cluster analysis in the Severe Asthma Research Program. *Am J Respir Crit Care Med* 2010; 181: 315-323.
2. Karypis, M. S. G., Kumar, V., & Steinbach, M. (2000, May). A comparison of document clustering techniques. In TextMining Workshop at KDD2000 (May 2000).

**Table S1.** Data obtained from the participants

| <b>Domain</b>         | <b>Variable</b>                                                                                                                                                                                                                                                                                                                                           |
|-----------------------|-----------------------------------------------------------------------------------------------------------------------------------------------------------------------------------------------------------------------------------------------------------------------------------------------------------------------------------------------------------|
| Basic characteristics | Age, sex, underlying renal disease                                                                                                                                                                                                                                                                                                                        |
| Physical data         | Body weight, height, BMI, systolic and diastolic blood pressure*, urine volume                                                                                                                                                                                                                                                                            |
| Blood test            | Complete blood count, total protein, albumin, AST, ALT, $\gamma$ -GTP, ALP, uric acid, blood urea nitrogen, creatinine, sodium, potassium, chloride, calcium, phosphate, magnesium, CRP, total cholesterol, triglyceride, high-density lipoprotein, iron, ferritin, unsaturated iron binding capacity, BNP, iPTH, glucose, HbA1c, $\beta$ 2-microglobulin |
| Urinary test          | Specific gravity, pH, sodium, potassium, chloride, calcium, phosphate, magnesium, urea nitrogen, creatinine, uric acid, protein, NAG, $\alpha$ 1-microglobulin, L-FABP                                                                                                                                                                                    |

\*, Blood pressure was measured at the beginning of first dialysis therapy.

Abbreviations: ALT, alanine aminotransferase; AST, aspartate aminotransferase; BMI, body mass index; BNP, B-type natriuretic peptide; CRP, C-reactive protein;  $\gamma$ -GTP,  $\gamma$ -glutamyl transpeptidase; HbA1c, hemoglobin A1c; iPTH, intact parathyroid hormone; L-FABP, liver-type fatty acid-binding protein; NAG, N-acetyl- $\beta$ -D-glucosaminidase

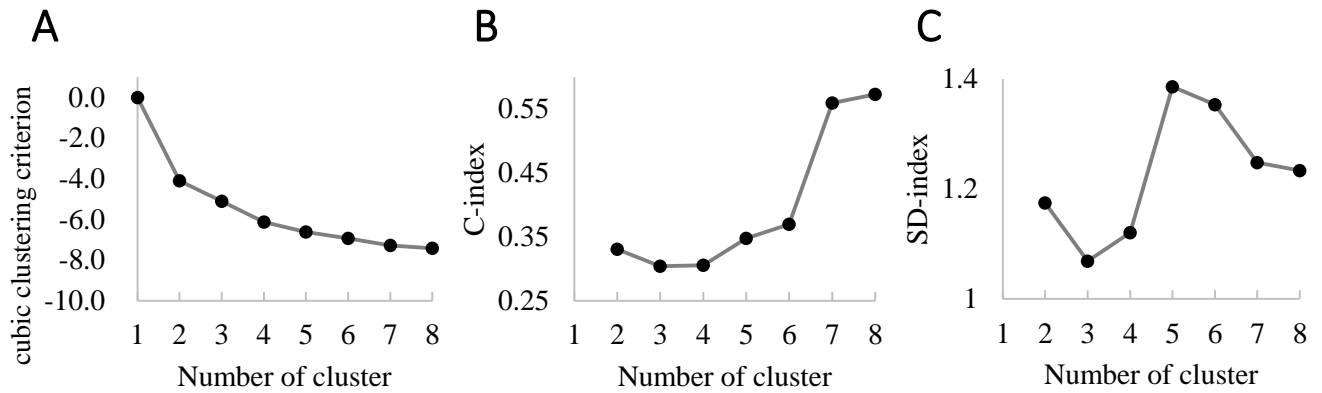

**Figure S1:** Validation of the optimal number of clusters.

The cubic clustering criterion, C-index, and SD-index were calculated in order to determine the best number of clusters for the 101 patients. The maximum value given by the cubic clustering criterion and the minimum values obtained using the C-index and SD-index are generally considered to give the optimal number of clusters. (A) The cubic clustering criterion shows a monotonic, decreasing trend, suggesting a unimodal nature of the cohort. (B, C) Both C-index and SD-index reach their minima with cluster three. This value has been adopted for subsequent analyses.

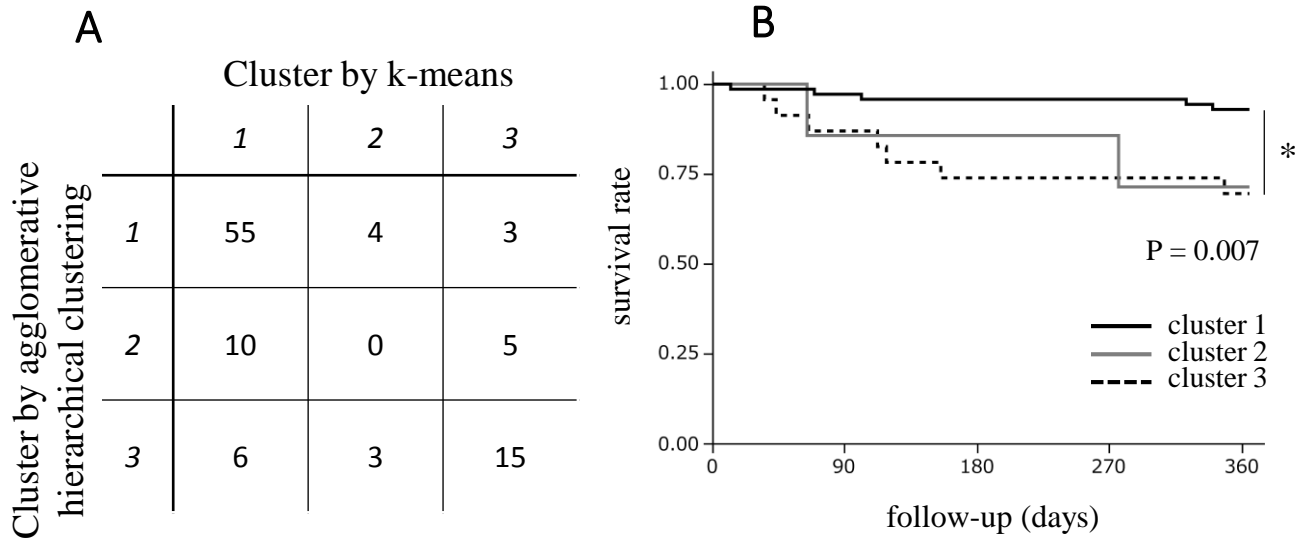

**Figure S2:** Clustering analysis by k-means method.

(A) Reclassification by k-means method generated different clustering result, compared with the original agglomerative hierarchical clustering approach. Most patients in the original cluster 1 and 3 remained, but patients in the cluster 2 were divided into new cluster 1 and 3. (B) Kaplan-Meier survival analysis still showed significant difference in the new clusters (P=0.007). \*, P < 0.05

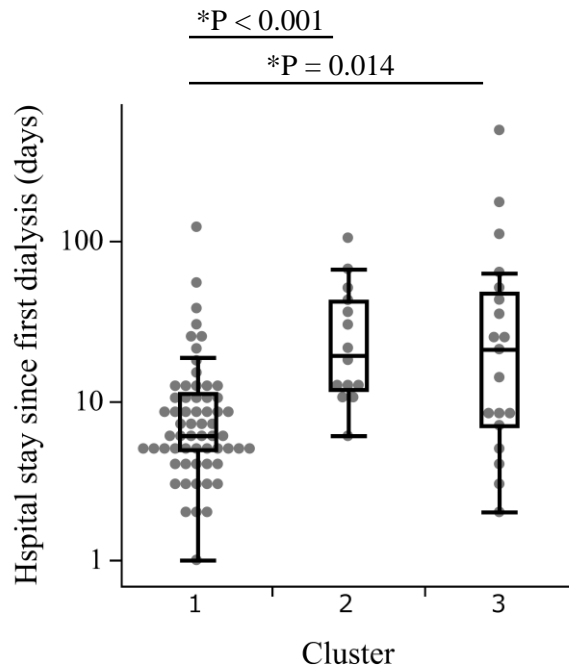

**Figure S3:** Length of hospital stay since dialysis therapy was initiated. Length of hospital stay since the first hemodialysis therapy was compared for the three clusters. Cluster 1 (6 [5, 11] days) showed significantly shorter hospital stay compared with cluster 2 (20 [12, 42] days) and cluster 3 (21 [7, 48] days). \*,  $P < 0.05$

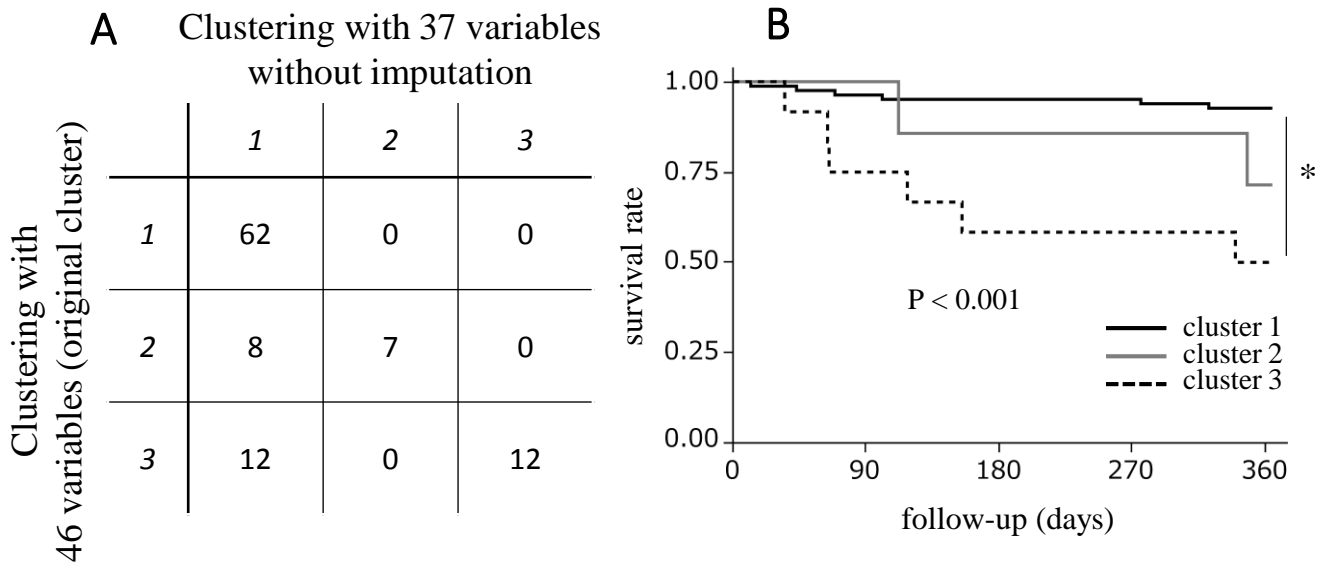

**Figure S4:** Agglomerative hierarchical clustering with 37 variables without missing data. As sensitivity analysis, agglomerative hierarchical clustering was performed in 101 patients only with 37 variables without missing value. (A) All patients in cluster 1 remained, but 8 and 12 patients in original cluster 2 and 3 moved to new cluster 1, respectively. (B) Kaplan Meier survival analysis still showed significant difference in the new clusters ( $P < 0.001$ ). \*,  $P < 0.05$

STROBE Statement—Checklist of items that should be included in reports of *cohort studies*

|                              | Item No | Recommendation                                                                                                                                                                                    | Page No              |
|------------------------------|---------|---------------------------------------------------------------------------------------------------------------------------------------------------------------------------------------------------|----------------------|
| <b>Title and abstract</b>    | 1       | (a) Indicate the study’s design with a commonly used term in the title or the abstract                                                                                                            | 2                    |
|                              |         | (b) Provide in the abstract an informative and balanced summary of what was done and what was found                                                                                               | 2                    |
| <b>Introduction</b>          |         |                                                                                                                                                                                                   |                      |
| Background/rationale         | 2       | Explain the scientific background and rationale for the investigation being reported                                                                                                              | 4-5                  |
| Objectives                   | 3       | State specific objectives, including any prespecified hypotheses                                                                                                                                  | 5                    |
| <b>Methods</b>               |         |                                                                                                                                                                                                   |                      |
| Study design                 | 4       | Present key elements of study design early in the paper                                                                                                                                           | 6                    |
| Setting                      | 5       | Describe the setting, locations, and relevant dates, including periods of recruitment, exposure, follow-up, and data collection                                                                   | 6-7                  |
| Participants                 | 6       | (a) Give the eligibility criteria, and the sources and methods of selection of participants. Describe methods of follow-up                                                                        | 6-7                  |
|                              |         | (b) For matched studies, give matching criteria and number of exposed and unexposed                                                                                                               | N/A                  |
| Variables                    | 7       | Clearly define all outcomes, exposures, predictors, potential confounders, and effect modifiers. Give diagnostic criteria, if applicable                                                          | 6-8                  |
| Data sources/<br>measurement | 8*      | For each variable of interest, give sources of data and details of methods of assessment (measurement). Describe comparability of assessment methods if there is more than one group              | 7-8                  |
| Bias                         | 9       | Describe any efforts to address potential sources of bias                                                                                                                                         | 7                    |
| Study size                   | 10      | Explain how the study size was arrived at                                                                                                                                                         | 6                    |
| Quantitative variables       | 11      | Explain how quantitative variables were handled in the analyses. If applicable, describe which groupings were chosen and why                                                                      | 8                    |
| Statistical methods          | 12      | (a) Describe all statistical methods, including those used to control for confounding                                                                                                             | 7-8                  |
|                              |         | (b) Describe any methods used to examine subgroups and interactions                                                                                                                               | 7-8                  |
|                              |         | (c) Explain how missing data were addressed                                                                                                                                                       | 7                    |
|                              |         | (d) If applicable, explain how loss to follow-up was addressed                                                                                                                                    | 7                    |
|                              |         | (e) Describe any sensitivity analyses                                                                                                                                                             | 9                    |
| <b>Results</b>               |         |                                                                                                                                                                                                   |                      |
| Participants                 | 13*     | (a) Report numbers of individuals at each stage of study—eg numbers potentially eligible, examined for eligibility, confirmed eligible, included in the study, completing follow-up, and analysed | 9                    |
|                              |         | (b) Give reasons for non-participation at each stage                                                                                                                                              | 9                    |
|                              |         | (c) Consider use of a flow diagram                                                                                                                                                                | Fig1                 |
| Descriptive data             | 14*     | (a) Give characteristics of study participants (eg demographic, clinical, social) and information on exposures and potential confounders                                                          | 9, Table 2           |
|                              |         | (b) Indicate number of participants with missing data for each variable of interest                                                                                                               | 9, Table 1, Table S1 |
|                              |         | (c) Summarise follow-up time (eg, average and total amount)                                                                                                                                       | 11                   |
| Outcome data                 | 15*     | Report numbers of outcome events or summary measures over time                                                                                                                                    | 11, Figure 3         |



|                          |    |                                                                                                                                                                                                                                                                                                                                                                                                               |                                    |
|--------------------------|----|---------------------------------------------------------------------------------------------------------------------------------------------------------------------------------------------------------------------------------------------------------------------------------------------------------------------------------------------------------------------------------------------------------------|------------------------------------|
| Main results             | 16 | (a) Give unadjusted estimates and, if applicable, confounder-adjusted estimates and their precision (eg, 95% confidence interval). Make clear which confounders were adjusted for and why they were included<br>(b) Report category boundaries when continuous variables were categorized<br>(c) If relevant, consider translating estimates of relative risk into absolute risk for a meaningful time period | 12-13<br>Table 3<br><br>N/A<br>N/A |
| Other analyses           | 17 | Report other analyses done—eg analyses of subgroups and interactions, and sensitivity analyses                                                                                                                                                                                                                                                                                                                | N/A                                |
| <b>Discussion</b>        |    |                                                                                                                                                                                                                                                                                                                                                                                                               |                                    |
| Key results              | 18 | Summarise key results with reference to study objectives                                                                                                                                                                                                                                                                                                                                                      | 14                                 |
| Limitations              | 19 | Discuss limitations of the study, taking into account sources of potential bias or imprecision. Discuss both direction and magnitude of any potential bias                                                                                                                                                                                                                                                    | 17, 18                             |
| Interpretation           | 20 | Give a cautious overall interpretation of results considering objectives, limitations, multiplicity of analyses, results from similar studies, and other relevant evidence                                                                                                                                                                                                                                    | 15, 16                             |
| Generalisability         | 21 | Discuss the generalisability (external validity) of the study results                                                                                                                                                                                                                                                                                                                                         | 17, 18                             |
| <b>Other information</b> |    |                                                                                                                                                                                                                                                                                                                                                                                                               |                                    |
| Funding                  | 22 | Give the source of funding and the role of the funders for the present study and, if applicable, for the original study on which the present article is based                                                                                                                                                                                                                                                 | 1<br>(None)                        |

\*Give information separately for exposed and unexposed groups.

**Note:** An Explanation and Elaboration article discusses each checklist item and gives methodological background and published examples of transparent reporting. The STROBE checklist is best used in conjunction with this article (freely available on the Web sites of PLoS Medicine at <http://www.plosmedicine.org/>, Annals of Internal Medicine at <http://www.annals.org/>, and Epidemiology at <http://www.epidem.com/>). Information on the STROBE Initiative is available at <http://www.strobe-statement.org>.
